# Supplementary material for: Sustainability-inspired upcycling of waste polyethylene terephthalate plastic into porous carbon for CO2 capture
Source: Royal Society of Chemistry journal article supplement (doi:10.1039/d1gc03600a), 2022-01-01
Supplement: d1gc03600a1.pdf [file d1gc03600a1.pdf]

**Supplementary Information for Green Chemistry**

**Sustainability-inspired upcycling of waste polyethylene terephthalate (PET) plastic  
into porous carbon for CO<sub>2</sub> capture**

Xiangzhou Yuan<sup>a,b§</sup>, Nallapaneni Manoj Kumar<sup>c§</sup>, Boris Brigljević<sup>d§</sup>, Shuangjun Li<sup>e</sup>, Shuai Deng<sup>e</sup>, Manhee  
Byun<sup>d</sup>, Boreum Lee<sup>d</sup>, Carol Sze Ki Lin<sup>c</sup>, Daniel C.W. Tsang<sup>f</sup>, Ki Bong Lee<sup>g</sup>, Shauhrat S. Chopra<sup>c\*\*\*</sup>,  
Hankwon Lim<sup>d\*\*</sup>, Yong Sik Ok<sup>a\*</sup>

<sup>a</sup> Korea Biochar Research Center, APRU Sustainable Waste Management Program & Division of  
Environmental Science and Ecological Engineering, Korea University, Seoul 02841, Republic of Korea

<sup>b</sup> R&D Centre, Sun Brand Industrial Inc., Jeollanam-do 57248, Republic of Korea

<sup>c</sup> School of Energy and Environment, City University of Hong Kong, Tat Chee Avenue, Kowloon, Hong  
Kong, China

<sup>d</sup> School of Energy and Chemical Engineering, Ulsan National Institute of Science and Technology, 50  
UNIST-gil, Eonyang-eup, Ulju-gun, Ulsan 44919, Republic of Korea

<sup>e</sup> Key Laboratory of Efficient Utilization of Low and Medium Grade Energy (Tianjin University), Ministry  
of Education of China, Tianjin, China

<sup>f</sup> Department of Civil and Environmental Engineering, The Hong Kong Polytechnic University, Hung  
Hom, Kowloon, Hong Kong, China

<sup>g</sup> Department of Chemical and Biological Engineering, Korea University, Seoul 02841, Republic of Korea

<sup>§</sup> These authors contributed equally as first authors.

Corresponding authors:

\* Email: yongsikok@korea.ac.kr; \*\* Email: hklm@unist.ac.kr; \*\*\* Email: sschopra@cityu.edu.hk

## Porous carbon sample synthesis

In this study, we synthesized three porous carbons from waste PET plastic bottles, using three different activation routes. First, based on a thermogravimetric analysis (TGA, TA Instruments Q50), we determined that waste PET plastic was carbonized at 600 °C for 1 h under an N<sub>2</sub> flow rate of 200 mL/min<sup>S1</sup>. The as-received sample was termed “PET6.”

### ✚ CO<sub>2</sub> physical activation

We loaded 5 g of PET6 into a horizontal tubular reactor (inner diameter 50 mm), then the reactor was heated to 900 °C (at a heating rate of 10 °C/min) and held at 900 °C for 2 h under a CO<sub>2</sub> flow rate of 200 mL/min. After the tubular reactor cooled from the operating temperature to room temperature, the as-received sample was named “PET6-CO<sub>2</sub>-9.”

### ✚ Potassium hydroxide (KOH) chemical activation<sup>S1</sup>

A mixture of 5 g of PET6 and 10 g of KOH was added to 25 mL of deionized water at 60 °C for 1 h, and the mixture was then dried in a furnace at 110 °C overnight to remove the water. This dried mixture was further activated in a horizontal tubular reactor at 700 °C (heating rate of 10 °C/min) for 1 h under a N<sub>2</sub> flow rate of 200 mL/min, followed by treatment with a 0.5 N HCl solution to remove the remaining potassium component. After drying in a furnace at 110 °C overnight, the KOH-activated sample was collected and termed “PET6K7.”

### ✚ KOH/urea co-activation<sup>S1</sup>

Given that effective N-doping could enhance the uptake of and selectivity for CO<sub>2</sub> over other gases, we prepared N-doped porous carbon derived from waste PET plastic waste through a one-pot synthesis. We mixed 5 g of PET6 with KOH and urea (mass ratio of 1:2:1) in 25 mL of distilled water, and then dried the mixture in a furnace at 110 °C overnight to remove the water. The dried mixture was activated at 700 °C (heating rate of 10 °C/min) for 1 h under a N<sub>2</sub> flow rate of 200 mL/min. The same washing and drying treatments used for the previous activation method were applied, and the final sample was named “PET6KU7.”

## Clausius–Clapeyron equation

The isosteric heat of adsorption ( $Q_{st}$ ), which can be used to measure the strength of the forces acting between the adsorbate molecules and the adsorbent surface, was calculated using the Clausius–Clapeyron equation (S1)<sup>S2</sup>. Information on the heat of adsorption is important for ensuring the correct equipment and process design.

$$Q_{st} = -R \left[ \frac{\partial \ln p}{\partial \left( \frac{1}{T} \right)} \right]_{q_e}, \quad (S1)$$

where  $R$  is the universal gas constant,  $T$  is the absolute temperature, and  $p$  is the pressure.

### Energy consumption related indicators

The specific energy consumption  $E$  can be calculated based on the Carnot theorem:

$$E = w_{vac} + q_{heat} \left( \frac{T_{heat} - T_{cool}}{T_{heat}} \right) \quad (S2)$$

where the specific work consumption  $w_{vac}$  represents the work consumed by the vacuum pump in the vacuuming step<sup>S3</sup>. The specific heat input  $q_{heat}$  in the heating step<sup>S4</sup> was calculated as follows:

$$w_{vac} = \frac{n_{vac}}{N_{CO_2,des}} \frac{22.4}{\eta_{vac}} \frac{k}{k-1} P_H \left[ \left( \frac{P_H}{P_{vac}} \right)^{\frac{k-1}{k}} - 1 \right] \quad (S3)$$

$$Q_{heat} = (1 - \varepsilon) V_{bed} \left[ C_{p,ad} (T_H - T_L) + \rho_{ad} (\Delta n_{CO_2,des} \Delta H_1 + \Delta n_{N_2,des} \Delta H_2) \right] + V_w \quad (S4)$$

$$q_{heat} = \frac{Q_{heat}}{N_{CO_2,des} M_{CO_2}} \quad (S5)$$

where  $k$  and  $\eta_{vac}$  are the adiabatic coefficient of air and efficiency of the vacuum pump, respectively,

and have values of 1.4, 0.7, respectively.  $M_{CO_2}$  is the molar mass of the  $CO_2$ .

The exergy efficiency  $E_{ex}$  of the process was calculated as described below, with the minimum separation work  $w_{min}$  defined previously<sup>S5,S6</sup>. Therefore, the energy level used in the system can be evaluated.

$$E_{ex} = w_{min}/E \quad (S6)$$

### Ideal adsorption solution theory

Adsorption selectivity ( $S_{i,j}$ ) for a binary mixture of CO<sub>2</sub> and N<sub>2</sub> was calculated by the ideal adsorption solution theory (IAST) using Eq. (S7)<sup>S7</sup>. In the selectivity calculation, it was assumed that only N<sub>2</sub> and CO<sub>2</sub> were involved, and the sum of the partial pressures of N<sub>2</sub> and CO<sub>2</sub> was equal to 1 atm.

$$S_{i,j} = \frac{q_i/p_i}{q_j/p_j} \quad (S7)$$

where  $p_i$  and  $q_i$  represent the partial pressure and adsorption uptake of component  $i$ , respectively.

### Detailed information for the 5-step TVSA

TVSA process is a typical temperature swing adsorption (TSA)-series process, in which the vacuuming is added into the TSA process as the additional step (as exhibited in **Figure S1**). Generally, in a 4-step TSA cycle, four steps (i.e., heating, cooling, pressurization, and adsorption) are considered. In the heating step, the CO<sub>2</sub> adsorbed releases from adsorbent when being heated up to the desorption temperature. In the cooling step, the temperature of adsorbent is cooled down, which is ready for CO<sub>2</sub> adsorption. In the pressurization step, the feed gas flows into one port of the adsorption column at a constant speed while the other port is closed, so the pressure of inside column increases. When reaching the adsorption pressure, the other port of the adsorption column is opened for the outflow of the N<sub>2</sub> waste, and the pressure of inside column stays at the adsorption pressure by a counterbalance valve until the adsorbent becomes saturated in the adsorption step. Moreover, as detailed described in **Table S2**, in

the 5-step TVSA process, the pressure decreases to the vacuuming pressure in the additional vacuuming step, which is determined by the selected vacuum pump.

#### **Supporting information for discussion section**

The ideal porous carbon for CO<sub>2</sub> capture has excellent CO<sub>2</sub> adsorption capacity, high selectivity, stable recyclability, fast adsorption/desorption kinetics, and facile regeneration<sup>S8</sup>. As presented in **Figure 1b**, **Figure S2**, **Figure 2**, and **Table S1**, varying the adsorption temperature, the highest CO<sub>2</sub> uptake values at 1 bar that could be attained was 6.25 mmol/g at 0 °C by PET6-CO<sub>2</sub>-9, 4.58 mmol/g at 25 °C by PET6-KU7 and 2.82 mmol/g at 50 °C by PET6-KU7<sup>S1</sup>, demonstrating high applicability to the practical CO<sub>2</sub> capture process. Specifically, the N<sub>2</sub> adsorption isotherms of the three porous carbons (**Figure 2a-c**) indicate that the WPDPs show good selectivity for CO<sub>2</sub> over N<sub>2</sub>. Based on the pure gas isotherms, the ideal adsorbed solution theory (IAST, Eq. S7) was employed to evaluate the selectivity of CO<sub>2</sub> over N<sub>2</sub> of three samples in a flue gas mixture consisting of 10% CO<sub>2</sub> and 90% N<sub>2</sub><sup>S7</sup>. The IAST CO<sub>2</sub> selectivity over N<sub>2</sub> of PET6-CO<sub>2</sub>-9, PET6-K7, and PET6-KU7 was estimated to be 10.50, 13.52, and 18.29 at 25 °C, respectively. The PET6-KU7 demonstrated the highest CO<sub>2</sub> selectivity over N<sub>2</sub> at 25 °C, which is similar to or higher than the selectivity of microporous carbons reported in previous studies<sup>S7,S9,S10</sup>. Moreover, the stable recyclability, fast adsorption/desorption kinetics, and facile regeneration were verified, as shown in **Figure 2d-f**. Based on these observations and lab-scale experimental data, we conclude that upcycling waste PET plastic bottles into porous carbons offers a promising pathway. The CO<sub>2</sub> capture process using WPDPs is mainly dominated by physisorption, because 1) as shown in **Figure 2a-c**, the CO<sub>2</sub> uptake at a certain adsorption pressure decreased as the adsorption temperature was increased from 0 °C to 50 °C, indicating that physisorption dominates the CO<sub>2</sub> adsorption process<sup>S1,S11-S13</sup>; and 2)

all of the values of  $Q_{st}$  were less than 26 kJ/mol, corroborating that the CO<sub>2</sub> adsorption process was controlled by physisorption<sup>S13,S14</sup>.

**Table S1.** Physical properties and operation parameters of the system.

| Parameter                                         | Value   | Unit                                    |
|---------------------------------------------------|---------|-----------------------------------------|
| Feed gas composition                              | 0.2/0.8 | vol% (CO <sub>2</sub> /N <sub>2</sub> ) |
| Feed flow speed, $v_{in}$                         | 1.05    | m/s                                     |
| Length of adsorption chamber, $L$                 | 3000    | mm                                      |
| Outer diameter of the adsorption chamber          | 310     | mm                                      |
| Inner diameter of the adsorption chamber          | 300     | mm                                      |
| Number of finned tubes in each adsorption chamber | 6       | --                                      |
| Outer diameter of the finned tube                 | 25      | mm                                      |
| Inner diameter of the finned tube                 | 20      | mm                                      |
| Fin height                                        | 13      | mm                                      |
| Fin spacing                                       | 8       | mm                                      |
| Overall heat transfer coefficient, $h$            | 100     | J/(m <sup>2</sup> s K)                  |
| Bed heat capacity, $C_{p,ad}$                     | 1       | MJ/(m <sup>3</sup> K)                   |
| Chamber wall heat capacity, $C_{p,w}$             | 4       | MJ/(m <sup>3</sup> K)                   |

**Table S2.** Physical phenomena that occur during the detailed steps of the temperature-vacuum swing adsorption (TVSA) process, as derived from a previous publication<sup>S15</sup>.

| Steps          | Gas flow                                                                                                                                                        | Pressure                                                                                                                                    | Temperature                                                                                                             |
|----------------|-----------------------------------------------------------------------------------------------------------------------------------------------------------------|---------------------------------------------------------------------------------------------------------------------------------------------|-------------------------------------------------------------------------------------------------------------------------|
| Pressurization | The feed gas (CO <sub>2</sub> /N <sub>2</sub> ) flows into one port of the adsorption chamber at a constant speed ( $v_f$ ).                                    | As the other port is closed, the pressure inside the chamber rises from a low (PL) to a high value ( $P_H$ ).                               | The adsorption heat is removed by the cooling medium to maintain the chamber at a constant temperature ( $T_L$ ).       |
| Adsorption     | The feed gas (CO <sub>2</sub> /N <sub>2</sub> ) flows in from one port of the adsorption chamber at a constant speed ( $v_f$ ), while the other port is opened. | The pressure inside the chamber is maintained at a constant value ( $P_H$ ).                                                                | The adsorption heat is removed by the cooling medium to maintain the chamber at a constant temperature ( $T_L$ ).       |
| Heating        | The desorbed gas flows out from one port of the adsorption chamber, while the other port is closed.                                                             | The pressure inside the chamber is maintained the constant value ( $P_H$ ).                                                                 | The adsorption chamber is heated by the heating medium to attain the desorption temperature ( $T_H$ ).                  |
| Vacuuming      | The desorbed gas is drawn out by the vacuum pump from one port of the adsorption chamber, while the other port is closed.                                       | Due to the continuous work of the vacuum pump, the pressure inside the chamber is decreased to attain the vacuuming pressure ( $P_{vac}$ ). | The temperature of the adsorption chamber slightly decreases and is maintained at a constant temperature ( $T_{vac}$ ). |
| Cooling        | Both ports are closed; no gas flows into or out of the adsorption chamber.                                                                                      | As the temperature drops, the pressure inside the closed adsorption chamber further reduces to attain the desorption pressure ( $P_L$ ).    | The adsorption chamber is cooled down by the cooling medium to attain the adsorption temperature ( $T_L$ ).             |



**Table S3.** Governing equations group for steady-state modelling, as derived from a previous publication <sup>S16</sup>.

| Step           | Equations                                                                                                                                                                                                                                                                                                                                                                                                                                                                                                                                                                                                                                                                                                                                                                                                                                                                                                                                                                                                                                                                                                                                                                                                                                                                                                                                            |
|----------------|------------------------------------------------------------------------------------------------------------------------------------------------------------------------------------------------------------------------------------------------------------------------------------------------------------------------------------------------------------------------------------------------------------------------------------------------------------------------------------------------------------------------------------------------------------------------------------------------------------------------------------------------------------------------------------------------------------------------------------------------------------------------------------------------------------------------------------------------------------------------------------------------------------------------------------------------------------------------------------------------------------------------------------------------------------------------------------------------------------------------------------------------------------------------------------------------------------------------------------------------------------------------------------------------------------------------------------------------------|
| Pressurization | $f_{\text{press}}^{\text{end}} = \frac{RT}{\varepsilon P_H} \left\{ \frac{\varepsilon P_L}{RT} (f_{\text{cool}}^{\text{end}} - f_{\text{in}}) + \rho_{\text{ad}} (n_{1\text{cool}}^{\text{end}} - n_{1\text{press}}^{\text{end}}) + f_{\text{in}} \left[ \frac{\varepsilon P_H}{RT} + \rho_{\text{ad}} (n_{1\text{press}}^{\text{end}} + n_{2\text{press}}^{\text{end}}) - \rho_{\text{ad}} (n_{1\text{cool}}^{\text{end}} + n_{2\text{cool}}^{\text{end}}) \right] \right\}$ $t_{\text{press}} = \left[ \frac{\varepsilon P_H}{RT} + \rho_{\text{ad}} (n_{1\text{press}}^{\text{end}} + n_{2\text{press}}^{\text{end}}) - \frac{\varepsilon P_L}{RT} - \rho_{\text{ad}} (n_{1\text{cool}}^{\text{end}} + n_{2\text{cool}}^{\text{end}}) \right] \frac{LRT_L}{P_H v_{\text{in}}}$                                                                                                                                                                                                                                                                                                                                                                                                                                                                                                                                                                    |
| Adsorption     | $t_{\text{ads}} = \frac{RT_L \left\{ L\rho_{\text{ad}} \left[ (n_{1\text{ads}}^{\text{end}} + n_{2\text{ads}}^{\text{end}}) + (n_{2\text{ads}}^{\text{end}} - n_{2\text{press}}^{\text{end}}) - (n_{1\text{press}}^{\text{end}} + n_{2\text{press}}^{\text{end}}) \right] + L \frac{\varepsilon P_H}{RT_L} (f_{\text{press}}^{\text{end}} - f_{\text{ads}}^{\text{end}}) \right\}}{v_{\text{in}} P_H f_{\text{in}}}$                                                                                                                                                                                                                                                                                                                                                                                                                                                                                                                                                                                                                                                                                                                                                                                                                                                                                                                                 |
| Heating        | $\left\{ \frac{\varepsilon P}{RT} + \rho_{\text{ad}} \left[ (1-f) \frac{\partial n_1}{\partial f} - f \frac{\partial n_2}{\partial f} \right] \right\} \frac{df}{dt} + \rho_{\text{ad}} \left[ (1-f) \frac{\partial n_1}{\partial T} - f \frac{\partial n_2}{\partial T} \right] \frac{dT}{dt} = 0$ $\left[ C_{\text{p,ad}} + \rho_{\text{ad}} \left( \Delta H_1 \frac{\partial n_1}{\partial T} + \Delta H_2 \frac{\partial n_2}{\partial T} \right) \right] \frac{dT}{dt} + \rho_{\text{ad}} \left( \Delta H_1 \frac{\partial n_1}{\partial f} + \Delta H_2 \frac{\partial n_2}{\partial f} \right) \frac{df}{dt} = Sh(T_{\text{heat}} - T)$                                                                                                                                                                                                                                                                                                                                                                                                                                                                                                                                                                                                                                                                                                       |
| Vacuuming      | $\left[ (\rho_{\text{ad}} f - \rho_{\text{ad}}) \frac{\partial n_1}{\partial T} + \rho_{\text{ad}} f \frac{\partial n_2}{\partial T} \right] \frac{dT}{dt} + \left[ -\frac{\varepsilon f}{RT} + (\rho_{\text{ad}} f - \rho_{\text{ad}}) \frac{\partial n_1}{\partial f} + \rho_{\text{ad}} f \frac{\partial n_2}{\partial f} \right] \frac{df}{dt} + \left[ \frac{\varepsilon f}{RT} + (\rho_{\text{ad}} f - \rho_{\text{ad}}) \frac{\partial n_1}{\partial P} + \rho_{\text{ad}} f \frac{\partial n_2}{\partial P} \right] \frac{dP}{dt} = 0$ $\left[ C_{\text{p,ad}} + \rho_{\text{ad}} \left( \Delta H_1 \frac{\partial n_1}{\partial T} + \Delta H_2 \frac{\partial n_2}{\partial T} \right) \right] \frac{dT}{dt} + \rho_{\text{ad}} \left( \Delta H_1 \frac{\partial n_1}{\partial f} + \Delta H_2 \frac{\partial n_2}{\partial f} \right) \frac{df}{dt} + \rho_{\text{ad}} \left( \Delta H_1 \frac{\partial n_1}{\partial P} + \Delta H_2 \frac{\partial n_2}{\partial P} \right) \frac{dP}{dt} = 0$ $\left( \rho_{\text{ad}} \frac{\partial n_1}{\partial P} + \frac{\varepsilon f}{RT} \right) \frac{dP}{dt} + \left( \rho_{\text{ad}} \frac{\partial n_1}{\partial f} + \frac{\varepsilon P}{RT} \right) \frac{df}{dt} + \left( \rho_{\text{ad}} \frac{\partial n_1}{\partial T} - \frac{\varepsilon f P}{RT^2} \right) \frac{dT}{dt} = 0$ |
| Cooling        | $\left[ \rho_{\text{ad}} \left( \frac{\partial n_1}{\partial P} + \frac{\partial n_2}{\partial P} \right) + \frac{\varepsilon}{RT} \right] \frac{dP}{dt} + \left[ \rho_{\text{ad}} \left( \frac{\partial n_1}{\partial T} + \frac{\partial n_2}{\partial T} \right) - \frac{\varepsilon P}{RT^2} \right] \frac{dT}{dt} = 0$ $\left[ C_{\text{p,ad}} + \rho_{\text{ad}} \left( \Delta H_1 \frac{\partial n_1}{\partial T} + \Delta H_2 \frac{\partial n_2}{\partial T} \right) \right] \frac{dT}{dt} + \rho_{\text{ad}} \left( \Delta H_1 \frac{\partial n_1}{\partial f} + \Delta H_2 \frac{\partial n_2}{\partial f} \right) \frac{df}{dt} + \rho_{\text{ad}} \left( \Delta H_1 \frac{\partial n_1}{\partial P} + \Delta H_2 \frac{\partial n_2}{\partial P} \right) \frac{dP}{dt} = Sh(T_{\text{cool}} - T)$                                                                                                                                                                                                                                                                                                                                                                                                                                                                                                                                       |

**Table S4.** Reference values from proximate and ultimate analyses of pure and waste polyethylene terephthalate (PET) samples and normalized calculated averages.

| Reference                 | S17  | S18          | S18           | S19                          | S20  | S21  | S22  | S23  | S24  | S25  | calculated         | calculated          |
|---------------------------|------|--------------|---------------|------------------------------|------|------|------|------|------|------|--------------------|---------------------|
| PET sample information    | Pure | Waste fibers | Waste textile | Waste containers and bottles | Pure | Pure | Pure | Pure | MSW* | Pure | PET-pure (average) | PET-waste (average) |
| <b>Proximate analysis</b> |      |              |               |                              |      |      |      |      |      |      |                    |                     |
| Moisture                  | 0.0  | 0.0          | 1.4           | 0.5                          | 0.0  | 0.1  | 0.1  | 0.0  | 0.5  | 0.0  | 0.0                | 0.6                 |
| Volatile                  | 88.6 | 87.8         | 81.9          | 86.1                         | 84.1 | 93.4 | 88.1 | 90.6 | 83.9 | 92.3 | 89.8               | 84.9                |
| Fixed carbon              | 11.4 | 2.9          | 2.1           | 13.4                         | 13.9 | 6.4  | 11.8 | 9.4  | 13.8 | 7.5  | 10.1               | 8.1                 |
| Ash                       | 0.0  | 9.3          | 14.6          | 0.0                          | 0.0  | 0.1  | 0.0  | 0.0  | 1.8  | 0.2  | 0.0                | 6.4                 |
| <b>Ultimate analysis</b>  |      |              |               |                              |      |      |      |      |      |      |                    |                     |
| C                         | 64.2 | 61.9         | 61.5          | n.a                          | 64.1 | 62.5 | 62.1 | 62.9 | 62.5 | 62.0 | 63.1               | 67.8                |
| H                         | 4.7  | 4.3          | 4.6           | n.a                          | 3.7  | 1.2  | 4.4  | 4.3  | 4.8  | 4.1  | 3.7                | 5.0                 |
| N                         | 0.1  | 0.1          | 0.1           | n.a                          | 0.0  | 0.0  | 0.0  | 0.0  | 0.3  | 0.1  | 0.0                | 0.2                 |
| S                         | 0.6  | 0.1          | 0.1           | n.a                          | 0.0  | 0.0  | 0.0  | 0.0  | 0.0  | 0.0  | 0.1                | 0.1                 |
| O                         | 30.5 | 24.4         | 19.1          | n.a                          | 34.2 | 33.3 | 33.5 | 32.8 | 30.6 | 34.0 | 33.1               | 27.0                |

\*MSW: Municipal solid waste.

**Table S5.** Primary thermochemical conversion (slow pyrolysis) material balance for the process simulation (atomic balance error = 0.372%). The liquid/wax composition was estimated based on polyethylene terephthalate (PET) slow pyrolysis operating parameters (*p*, *T*, heating rate) from previously published studies and tuned to satisfy the atomic balance<sup>S26-S28</sup>.

| Feedstock        |       | Products (thermal decomposition at 5°C/min to 600°C + 1h at 600°C) |       |          |                    |                         |       |
|------------------|-------|--------------------------------------------------------------------|-------|----------|--------------------|-------------------------|-------|
| <b>PET, kg/h</b> | 1000  | <b>Liquid/wax, kg/h</b>                                            | 547.6 | CAS #    | ***B.P., °C, 1 atm | <b>Solid char, kg/h</b> | 110   |
| *PA %            |       | Terephthalic acid, wt.%                                            | 5.86  | 100-21-0 | 392.4              | UA, %                   |       |
| Moisture         | 0.04  | Benzoic acid, wt.%                                                 | 24.36 | 65-85-0  | 249.2              | C                       | 93.70 |
| Fixed carbon     | 10.11 | 4-Acetylbenzoic acid, wt.%                                         | 11.41 | 586-89-0 | 340.0              | H                       | 0.10  |
| Volatile matter  | 89.85 | 4-Methylbenzoic acid, wt.%                                         | 2.15  | 99-94-5  | 275.3              | N                       | 0.10  |
| Ash              | 0.05  | 4-Ethylbenzoic acid, wt.%                                          | 0.86  | 619-64-7 | 270.3              | S                       | 0.80  |
| **UA, %          |       | 4-Phenylbenzoic acid, wt.%                                         | 45.14 | 92-92-2  | 372.6              | O                       | 4.90  |
| C                | 63.03 | 4-Hydroxybenzoic acid, wt.%                                        | 0.07  | 99-96-7  | 336.2              | Ash                     | 0.40  |
| H                | 3.72  | 2-Naphthoic acid, wt.%                                             | 5.68  | 93-09-4  | 332.9              | <b>Gas, kg/h</b>        | 342.4 |
| N                | 0.02  | Dibutyl phthalate, wt.%                                            | 0.75  | 84-74-2  | 337.0              | CO, wt.%                | 45.13 |
| S                | 0.09  | Biphenyl, wt.%                                                     | 0.55  | 92-52-4  | 255.0              | CO <sub>2</sub> , wt.%  | 49.57 |
| O                | 33.09 | Phenantrene, wt.%                                                  | 0.62  | 85-01-8  | 337.4              | H <sub>2</sub> , wt.%   | 2.95  |
| Ash              | 0.05  | p-Terphenyl, wt.%                                                  | 2.54  | 92-94-4  | 400.0              | CH <sub>4</sub> , wt. % | 2.36  |

\*PA: Proximate analysis; \*\*UA: Ultimate analysis; \*\*\*BP: Boiling point.

The gate-to-gate life-cycle assessments (LCA) of the three adsorbent materials were modelled to compute the global warming potential (GWP) and other impact categories (see below) by taking into account the quantity of materials used in each activation process (CO<sub>2</sub>, KOH, urea, HCl) (**Table S9**). The emissions due to energy requirement is not accounted, as the industrial facility is planned to have captive power plant (i.e., waste heat to electricity unit).

**Table S6.** Summary of carbon activation process life cycle inventory (LCI) data of 1 kg of captured CO<sub>2</sub> by polyethylene terephthalate (PET)-derived porous carbon.

| <b>Description</b> | <b>PET6-CO<sub>2</sub>-9</b>        | <b>PET6-K7</b>                     | <b>PET6-KU7</b>                                    |
|--------------------|-------------------------------------|------------------------------------|----------------------------------------------------|
| Activation method  | CO <sub>2</sub> Physical Activation | KOH Chemical Activation            | KOH/Urea Chemical Activation                       |
| Input materials    | CO <sub>2</sub> : 502.65 kg         | KOH: 154.17 kg<br>HCl: 292.96 kg/h | KOH: 118.53 kg<br>HCl: 225.24 kg<br>Urea: 64.76 kg |
| Electricity        | 302.2780 kW                         | 222.6496 kW                        | 171.2984 kW                                        |

**Table S7.** List of impact categories.

| <b>Impact category</b>                  | <b>Unit</b>              |
|-----------------------------------------|--------------------------|
| Global warming                          | kg CO <sub>2</sub> eq    |
| Stratospheric ozone depletion           | kg CFC11 eq              |
| Ionising radiation                      | kBq Co-60 eq             |
| Ozone formation, human health           | kg NO <sub>x</sub> eq    |
| Fine particulate matter formation       | kg PM <sub>2.5</sub> eq  |
| Ozone formation, terrestrial ecosystems | kg NO <sub>x</sub> eq    |
| Terrestrial acidification               | kg SO <sub>2</sub> eq    |
| Freshwater eutrophication               | kg P eq                  |
| Marine eutrophication                   | kg N eq                  |
| Terrestrial ecotoxicity                 | kg 1,4-DCB               |
| Freshwater ecotoxicity                  | kg 1,4-DCB               |
| Marine ecotoxicity                      | kg 1,4-DCB               |
| Human carcinogenic toxicity             | kg 1,4-DCB               |
| Human non-carcinogenic toxicity         | kg 1,4-DCB               |
| Land use                                | m <sup>2</sup> a crop eq |
| Mineral resource scarcity               | kg Cu eq                 |
| Fossil resource scarcity                | kg oil eq                |
| Water consumption                       | m <sup>3</sup>           |

To carry out the techno-economic analysis (TEA), we required details on the equipment and other associated costs for a 1 t/h waste PET treatment plant. The total capital cost details are provided in **Table S8**. Data collection was done based on each process. The scaled model was subdivided into different processes: pre-treatment, pyrolysis, carbon activation process, power generation, flue gas treatment, miscellaneous expenses and infrastructure cost. The sum of all of these process costs was considered to represent the total capital investment (TCI).

**Table S8.** List of equipment and associated costs (CAPEX) for a 1 t/h waste polyethylene terephthalate (PET)-derived porous carbon production plant.

| Equipment cost                                               | Capacity                |          |          | Cost                    |              |            | Reference or Source |
|--------------------------------------------------------------|-------------------------|----------|----------|-------------------------|--------------|------------|---------------------|
|                                                              | PET6-CO <sub>2</sub> -9 | PET6-K7  | PET6-KU7 | PET6-CO <sub>2</sub> -9 | PET6-K7      | PET6-KU7   |                     |
| <b>Waste PET Pre-treatment Cost</b>                          |                         |          |          |                         |              |            |                     |
| Weighbridges                                                 | 50 t                    |          |          | € 21,500.00             |              |            | S29                 |
| Feedstock store                                              | 1500 t                  |          |          | € 5,680.50              |              |            | S30                 |
| Belt conveyer system                                         | 10 m                    |          |          | € 1,700.00              |              |            | *                   |
| Shredder                                                     | 1 t                     |          |          | € 7,682.40              |              |            | S31                 |
| Trommel screen with conveyers                                | 1 t                     |          |          | € 18,000.00             |              |            | *                   |
| Loading shovels                                              | 0.5 t                   |          |          | € 11,250.00             |              |            | *                   |
| Excavator                                                    | 0.5 t                   |          |          | € 11,250.00             |              |            | *                   |
| <i>Sub-total: 1 (ST1)</i>                                    |                         |          |          | € 77062.90              |              |            | -                   |
| <b>Pyrolysis Unit</b>                                        |                         |          |          |                         |              |            |                     |
| Auger screw-flue gas heated pyrolizer with vapour collection | 1 t/h                   |          |          | € 799,044.80            |              |            | S32                 |
| Auger conveyor belt                                          | 5 m                     |          |          | € 840.00                |              |            | *                   |
| Horizontal belt conveyors motors                             | 3 motors                | 5 motors |          | € 360.00                | € 600.00     |            | *                   |
| <i>Sub-total: 2 (ST2)</i>                                    |                         |          |          | € 800,244.80            | € 800,484.80 |            | -                   |
| <b>Carbon Activation Process</b>                             |                         |          |          |                         |              |            |                     |
| Activation reactor                                           | 0.11 t                  |          |          | € 3,200.00              |              |            | *                   |
| KOH solution storage tank                                    | 15 t                    |          |          | € 780.00                |              |            | *                   |
| Urea solution storage tank                                   | 6 t                     |          |          | € 320.00                |              |            | *                   |
| HCL solution storage tank                                    | 20 t                    |          |          | € 1,040.00              |              |            | *                   |
| Mixing tank                                                  | -                       | 1 t      | 2 t      | -                       | € 3,500.00   | € 7,000.00 | *                   |
| Dryer                                                        | -                       | 2        |          | -                       | € 8,000.00   |            | *                   |
| Washer                                                       | -                       | 1        |          | -                       | € 5,000.00   |            | *                   |

|                                                                     |                                                |                       |                       |                       |            |
|---------------------------------------------------------------------|------------------------------------------------|-----------------------|-----------------------|-----------------------|------------|
| Silo/Bin (Porous carbon storage)                                    | 2.5 t                                          | € 1,600.00            |                       |                       | *          |
| <i>Sub-total: 3 (ST3)</i>                                           |                                                | € 6,940.00            | € 23,440.00           | € 26,940.00           | -          |
| <b>Power Generation</b>                                             |                                                |                       |                       |                       |            |
| High pressure turbine                                               | 306.6 kW                                       | € 246,636.00          |                       |                       | S29        |
| Medium pressure turbine                                             | 347.8 kW                                       | € 280,326.80          |                       |                       | S29        |
| Low pressure turbine                                                | 614.6 kW                                       | € 495,367.50          |                       |                       | S29        |
| Organic Rankine cycle turbine                                       | 95.4 kW + 5 t (Working fluid)                  | € 571,323.62          |                       |                       | S33,S34,*a |
| Water chiller unit                                                  | 5 t/h                                          | € 5,725.00            |                       |                       | *          |
| Cold water storage tank                                             | 150 t                                          | € 30,750.00           |                       |                       | *          |
| <i>Sub-total: 4 (ST4)</i>                                           | <i>1341.97 kW</i>                              | € 1,630,128.92        |                       |                       | -          |
| <b>Flue gas treatment € 20,388.62</b>                               |                                                |                       |                       |                       |            |
| Pressure swing adsorption unit and associated components            | 1 unit (20 kg/h to 300 kg/h)                   | € 203,950.00          |                       |                       | *          |
| <i>Sub-total: 5 (ST5)</i>                                           |                                                | € 203,950.00          |                       |                       | -          |
| <b>Miscellaneous expenses</b>                                       |                                                |                       |                       |                       |            |
| Additional machinery                                                | -                                              | € 82,950.00           |                       |                       | S35        |
| <i>Sub-total: 6 (ST6)</i>                                           |                                                | € 82,950.00           |                       |                       | -          |
| <b>Infrastructure costs</b>                                         |                                                |                       |                       |                       |            |
| Land cost                                                           | 12,000 m <sup>2</sup> at €93.60/m <sup>2</sup> | € 1,123,200.00        |                       |                       | Estimated  |
| Office and laboratory equipment                                     | -                                              | € 400,000.00          |                       |                       | S35        |
| Buildings                                                           | -                                              | € 200,000.00          |                       |                       | Estimated  |
| <i>Sub-total: 7 (ST7)</i>                                           |                                                | € 1,723,200.00        |                       |                       | -          |
| <b>Total Capital Investment (TCI) = ST1+ST2+ST3+ST4+ST5+ST6+ST7</b> | -                                              | <b>€ 4,524,476.62</b> | <b>€ 4,541,186.62</b> | <b>€ 4,544,716.62</b> | -          |

Note: \* denotes data from <https://www.alibaba.com/>. All of the values were converted from RMB to Euros at a conversion rate RMB 1 = € 0.13; <sup>a</sup> represents the cost value for the working fluid.

The operational cost details were estimated after accounting for the material input required for the three-activation processes. The carbon required to ensure that the production unit remained burden free, and the other infrastructure overhead recurring charges are presented in **Table S9**. We obtained operational data based on the process requirement. Energy consumption was the most commonly required input required, which was supplied internally through the CHP plant. The net-energy efficiency of the CHP system ensured that the cost related to energy consumptions was negligible. The cost data related to consumables, especially those used for the activation process, were obtained from the suppliers and through Alibaba, the Internet company with which the long-term contracts were drawn.

The water required for the power generation process was obtained on a monthly basis from the Tianjin Industrial Use Water Suppliers at a price of RMB7.9/t (the price is regulated by the Price Monitoring Center, NDRC)<sup>S36</sup>. For the operational costs, the cost involved in capturing the released CO<sub>2</sub> emissions was also considered by taking into account the cost values for the purchased porous carbons.

**Table S9.** List of operational costs for a 1 t/h waste polyethylene terephthalate (PET) derived porous carbon production plant (annual operating hours = 8000 h).

| Equipment cost                                               | Capacity                                                                 |           |          | Cost                    |                |                | Reference or Source |
|--------------------------------------------------------------|--------------------------------------------------------------------------|-----------|----------|-------------------------|----------------|----------------|---------------------|
|                                                              | PET6-CO <sub>2</sub> -9                                                  | PET6-K7   | PET6-KU7 | PET6-CO <sub>2</sub> -9 | PET6-K7        | PET6-KU7       |                     |
| <b>Carbon Activation Process</b>                             |                                                                          |           |          |                         |                |                |                     |
| CO <sub>2</sub> gas                                          | 1.05 t/h                                                                 | -         | -        | 0.00 <sup>a</sup>       | -              | -              | -                   |
| KOH                                                          | -                                                                        | 0.421 t/h |          | -                       | € 232.00       |                | *                   |
| Urea                                                         | -                                                                        | -         | 0.23 t/h | -                       | -              | € 57.00        | *                   |
| HCL                                                          | -                                                                        | 0.8 t/h   |          | -                       | € 174.67       |                | *                   |
| <i>Sub-total: 8 (ST8)<sup>c</sup></i>                        | <i>Estimated per year</i>                                                |           |          | -                       | € 3,253,360.00 | € 3,709,360.00 | -                   |
| <b>Power Generation</b>                                      |                                                                          |           |          |                         |                |                |                     |
| Water                                                        | 3.9 t/h                                                                  |           |          | € 3.89                  |                |                | S36                 |
| <i>Sub-total: 9 (ST9)<sup>c</sup></i>                        | <i>Estimated per year</i>                                                |           |          | € 31,120.00             |                |                | -                   |
| <b>Flue Gas Treatment</b>                                    |                                                                          |           |          |                         |                |                |                     |
| Energy                                                       | Energy from the combined heat and power plant within the system boundary |           |          |                         |                |                |                     |
| Capture cost for plant emission <sup>b</sup>                 | 76 t                                                                     | 66 t      | 46 t     | € 95,852.16             | € 83,005.56    | € 57,852.36    | Estimated           |
| <i>Sub-total: 10 (ST10)</i>                                  |                                                                          |           |          | € 95,852.16             | € 83,005.56    | € 57,852.36    | -                   |
| <b>Human Resource</b>                                        |                                                                          |           |          |                         |                |                |                     |
| Workforce includes plant operators, administrative team etc. | Salaries and other expenses for 15 people per year                       |           |          | € 126,096.17            |                |                | Estimated           |
| <i>Sub-total: 11 (ST11)<sup>c</sup></i>                      | <i>Estimated per year</i>                                                |           |          | € 126,096.17            |                |                | -                   |



| <b>Miscellaneous Expenses <sup>c</sup></b>                        |                                                 |              |                |                |           |
|-------------------------------------------------------------------|-------------------------------------------------|--------------|----------------|----------------|-----------|
| Maintenance                                                       | 6% of TCI                                       | € 271,468.59 | € 272,471.19   | € 272,682.99   | 37        |
| Insurance                                                         | 2.5% of TCI                                     | € 113,111.92 | € 113,529.67   | € 113,617.92   | 38        |
| Contingencies                                                     | 5% of TCI                                       | € 226,223.83 | € 227,059.33   | € 227,235.83   | 39        |
| ICT infrastructure cost                                           | Per year                                        | € 5,000.00   |                |                | Estimated |
| Sub-total: 12 (ST12)                                              | <i>Estimated per year</i>                       | € 615,804.34 | € 618,060.19   | € 618,536.74   |           |
| <b>First Year Operation Cost (FYOC)=</b><br>ST8+ST9+ST10+ST11+S12 | <i>Estimated per year (first year)</i>          | € 868,872.67 | € 4,111,641.92 | € 4,542,965.27 | -         |
| <b>Yearly Operation Cost (YOC)=</b><br>ST8+S9+ST11+S12            | <i>Estimated per year (Second year onwards)</i> | € 773,020.51 | € 4,028,636.36 | € 4,485,112.91 | -         |

<sup>a</sup> the required CO<sub>2</sub> for physical activation was obtained from the pressure swing adsorption (PSA) unit; <sup>b</sup> one time cost in the first year only; <sup>c</sup> yearly expenses; \* denotes data obtained from <https://www.alibaba.com/>; All the values were converted from RMB to Euro at a conversion rate of RMB 1 = € 0.13.

From the proposed porous carbon production unit, revenues can be generated by selling the produced porous carbon and excess electricity from the combined heat and power (CHP) plant. The revenue streams are based on the period of plant operation (8000 h). Therefore, the pricing of porous carbon, especially in the Chinese market, should take into account. It has been observed that cost of the porous carbon varies as per the current market, the price range of 1 ton of porous carbon is between € 286.30 and € 2,862.99 (<https://www.alibaba.com/>). Besides from the sale of porous carbon, the sale of electricity sales at the feed-in-tariff rates was also found to be favourable owing to China's unified pricing scheme. In China, the national unified feed-in tariff of waste-to-energy projects, such as waste PET-derived combined heat and power plants, is set at \$0.106/kWh (€0.086/kWh)<sup>S40</sup>. The conversion to Euros was done as per the market value on 7<sup>th</sup> January 2021. There has been rising interest in carbon trading in China; therefore, we have considered the revenues generated by offsetting electricity (1.1082 tCO<sub>2</sub>/kWh is the current emission factor for the Northeast China Power Grid). The carbon price in the Tianjin region is currently RMB 10-15/ton of CO<sub>2</sub>eq. The pricing of the revenue parameters is given in **Table S13**.

**Table S10.** Revenue parameters.

| Parameters                          | Cost/value  | Remark                                                                   | References |
|-------------------------------------|-------------|--------------------------------------------------------------------------|------------|
| Porous carbon selling price (1 ton) | € 286.30    | Minimum selling price <sup>d</sup>                                       | *          |
|                                     | € 2,862.99  | Maximum selling price <sup>d</sup>                                       | *          |
| Electricity selling price (1 kWh)   | €0.086 /kWh | National unified feed-in tariff of waste-to-energy projects <sup>d</sup> | S40        |

\* denotes the data obtained from <https://www.alibaba.com/>. All of the values were converted from RMB to Euros at conversion rate of RMB 1 equals €0.13; <sup>d</sup> represents the market price (MP).

**Table S11.** Revenue generation by sales of the porous carbon (in Euro).

| Year     | Porous carbon (ton)     |          |          | Revenue (when sold at the minimum price) |                |                | Revenue (when sold at an average price) |                 |                 | Revenue (when sold at the maximum price) |                 |                 |
|----------|-------------------------|----------|----------|------------------------------------------|----------------|----------------|-----------------------------------------|-----------------|-----------------|------------------------------------------|-----------------|-----------------|
|          | PET6-CO <sub>2</sub> -9 | PET6-K7  | PET6-KU7 | PET6-CO <sub>2</sub> -9                  | PET6-K7        | PET6-KU7       | PET6-CO <sub>2</sub> -9                 | PET6-K7         | PET6-KU7        | PET6-CO <sub>2</sub> -9                  | PET6-K7         | PET6-KU7        |
| 1        | 704                     | 800      | 720      | 201,555.20                               | 229,040.00     | 206,136.00     | 1,107,494.08                            | 1,259,716.00    | 1,133,744.40    | 2,015,544.96                             | 2,290,392.00    | 2,061,352.80    |
| 2        | 704                     | 800      | 720      | 201,555.20                               | 229,040.00     | 206,136.00     | 1,107,494.08                            | 1,259,716.00    | 1,133,744.40    | 2,015,544.96                             | 2,290,392.00    | 2,061,352.80    |
| 3        | 704                     | 800      | 720      | 201,555.20                               | 229,040.00     | 206,136.00     | 1,107,494.08                            | 1,259,716.00    | 1,133,744.40    | 2,015,544.96                             | 2,290,392.00    | 2,061,352.80    |
| 4        | 704                     | 800      | 720      | 201,555.20                               | 229,040.00     | 206,136.00     | 1,107,494.08                            | 1,259,716.00    | 1,133,744.40    | 2,015,544.96                             | 2,290,392.00    | 2,061,352.80    |
| 5        | 704                     | 800      | 720      | 201,555.20                               | 229,040.00     | 206,136.00     | 1,107,494.08                            | 1,259,716.00    | 1,133,744.40    | 2,015,544.96                             | 2,290,392.00    | 2,061,352.80    |
| 6        | 704                     | 800      | 720      | 201,555.20                               | 229,040.00     | 206,136.00     | 1,107,494.08                            | 1,259,716.00    | 1,133,744.40    | 2,015,544.96                             | 2,290,392.00    | 2,061,352.80    |
| 7        | 704                     | 800      | 720      | 201,555.20                               | 229,040.00     | 206,136.00     | 1,107,494.08                            | 1,259,716.00    | 1,133,744.40    | 2,015,544.96                             | 2,290,392.00    | 2,061,352.80    |
| 8        | 704                     | 800      | 720      | 201,555.20                               | 229,040.00     | 206,136.00     | 1,107,494.08                            | 1,259,716.00    | 1,133,744.40    | 2,015,544.96                             | 2,290,392.00    | 2,061,352.80    |
| 9        | 704                     | 800      | 720      | 201,555.20                               | 229,040.00     | 206,136.00     | 1,107,494.08                            | 1,259,716.00    | 1,133,744.40    | 2,015,544.96                             | 2,290,392.00    | 2,061,352.80    |
| 10       | 704                     | 800      | 720      | 201,555.20                               | 229,040.00     | 206,136.00     | 1,107,494.08                            | 1,259,716.00    | 1,133,744.40    | 2,015,544.96                             | 2,290,392.00    | 2,061,352.80    |
| 11       | 704                     | 800      | 720      | 201,555.20                               | 229,040.00     | 206,136.00     | 1,107,494.08                            | 1,259,716.00    | 1,133,744.40    | 2,015,544.96                             | 2,290,392.00    | 2,061,352.80    |
| 11       | 704                     | 800      | 720      | 201,555.20                               | 229,040.00     | 206,136.00     | 1,107,494.08                            | 1,259,716.00    | 1,133,744.40    | 2,015,544.96                             | 2,290,392.00    | 2,061,352.80    |
| 13       | 704                     | 800      | 720      | 201,555.20                               | 229,040.00     | 206,136.00     | 1,107,494.08                            | 1,259,716.00    | 1,133,744.40    | 2,015,544.96                             | 2,290,392.00    | 2,061,352.80    |
| 14       | 704                     | 800      | 720      | 201,555.20                               | 229,040.00     | 206,136.00     | 1,107,494.08                            | 1,259,716.00    | 1,133,744.40    | 2,015,544.96                             | 2,290,392.00    | 2,061,352.80    |
| 15       | 704                     | 800      | 720      | 201,555.20                               | 229,040.00     | 206,136.00     | 1,107,494.08                            | 1,259,716.00    | 1,133,744.40    | 2,015,544.96                             | 2,290,392.00    | 2,061,352.80    |
| Lifetime | 10,560 t                | 12,000 t | 10,800 t | € 3,023,328.00                           | € 3,435,600.00 | € 3,092,040.00 | € 16,612,411.20                         | € 18,895,740.00 | € 17,006,166.00 | € 30,233,174.40                          | € 34,355,880.00 | € 30,920,292.00 |

The revenue earned by selling electricity was estimated by considering heat loss scenarios, as shown in **Table S12**.

**Table S12.** Heat loss scenarios resulting in power output losses.

| Parameters                     | PET6-CO <sub>2</sub> -9 |          |          |          |          | PET6-K7  |          |          |          |          | PET6-KU7  |          |          |          |          |
|--------------------------------|-------------------------|----------|----------|----------|----------|----------|----------|----------|----------|----------|-----------|----------|----------|----------|----------|
|                                | 1.00                    | 10.00    | 20.00    | 50.00    | 75.00    | 1.00     | 10.00    | 20.00    | 50.00    | 75.00    | 1.00      | 10.00    | 20.00    | 50.00    | 75.00    |
| Total Q loss; %                | 1.00                    | 10.00    | 20.00    | 50.00    | 75.00    | 1.00     | 10.00    | 20.00    | 50.00    | 75.00    | 1.00      | 10.00    | 20.00    | 50.00    | 75.00    |
| Tfg (Rankine in); C            | 1202.00                 | 1185.00  | 1167.00  | 1113.00  | 1067.00  | 1259.00  | 1243.00  | 1225.00  | 1170.00  | 1125.00  | 1245.00   | 1228.00  | 1208.00  | 1150.00  | 1100.00  |
| Rankine H <sub>2</sub> O; kg/h | 4010.00                 | 3915.00  | 3810.00  | 3490.00  | 3220.00  | 3925.00  | 3845.00  | 3750.00  | 3460.00  | 3220.00  | 3850.00   | 3760.00  | 3655.00  | 3345.00  | 3085.00  |
| Net; kW                        | 706.56                  | 678.25   | 646.97   | 551.55   | 470.99   | 706.56   | 682.80   | 654.53   | 568.00   | 496.50   | 703.35    | 676.60   | 645.25   | 552.84   | 475.31   |
| Act Q; MJ/h                    | -581.42                 | -581.42  | -581.42  | -581.42  | -581.42  | -252.89  | -252.89  | -252.89  | -252.89  | -252.89  | -486.0596 | -486.06  | -486.06  | -486.06  | -486.06  |
| Pyro Q; MJ/h                   | -2859.14                | -2859.14 | -2859.14 | -2859.14 | -2859.14 | -2859.14 | -2859.14 | -2859.14 | -2859.14 | -2859.14 | -2859.136 | -2859.14 | -2859.14 | -2859.14 | -2859.14 |
| Cooling water; kg/h            | 4043.00                 | 3971.00  | 3878.00  | 3623.00  | 3403.00  | 3983.00  | 3910.00  | 3831.00  | 3600.00  | 3411.00  | 3799.00   | 3712.00  | 3639.00  | 3385.00  | 3175.00  |
| Act Q Loss; MJ/h               | -5.81                   | -58.14   | -116.28  | -290.71  | -436.07  | -2.53    | -25.28   | -50.578  | -126.45  | -189.68  | -4.86     | -48.61   | -97.22   | -243.03  | -364.55  |
| Pyro Q Loss; MJ/h              | -28.60                  | -285.91  | -571.83  | -1429.57 | -2144.35 | -28.60   | -285.91  | -571.83  | -1429.57 | -2144.35 | -28.59    | -285.91  | -571.83  | -1429.57 | -2144.35 |

**Table S13.** Revenue generation by sales of electricity (in Euro).

| Sample                       | Lifetime varying different heat loss percentage |            |            |            |            |            |
|------------------------------|-------------------------------------------------|------------|------------|------------|------------|------------|
|                              | 0%                                              | 1%         | 10%        | 20%        | 50%        | 75%        |
| <b>PET6-CO<sub>2</sub>-9</b> | 85,200,000                                      | 84,787,200 | 81,390,000 | 77,636,400 | 66,186,000 | 56,518,800 |
| <b>PET6-K7</b>               | 87,988,800                                      | 84,787,200 | 81,936,000 | 78,543,600 | 68,160,000 | 59,580,000 |
| <b>PET6-KU7</b>              | 87,988,800                                      | 84,402,000 | 81,192,000 | 77,430,000 | 66,340,320 | 57,036,960 |

**Table S14.***Textural property, ultimate analysis, and CO<sub>2</sub> uptake of waste polyethylene terephthalate (PET) plastic-derived porous carbons.*

| Samples                 | $S_{\text{BET}}^{\text{a}}$ | $V_{\text{total}}^{\text{b}}$ | $V_{\text{micro}}^{\text{c}}$ | $V_{\text{micro}}/V_{\text{total}}$ | Atomic (%) <sup>d</sup> |       |      | CO <sub>2</sub> uptake |       |       |
|-------------------------|-----------------------------|-------------------------------|-------------------------------|-------------------------------------|-------------------------|-------|------|------------------------|-------|-------|
|                         |                             |                               |                               |                                     | C                       | O     | N    | (mmol/g) <sup>e</sup>  |       |       |
|                         | m <sup>2</sup> /g           | cm <sup>3</sup> /g            |                               |                                     |                         |       |      | 0 °C                   | 25 °C | 50 °C |
| PET6-CO <sub>2</sub> -9 | 1482                        | 0.607                         | 0.592                         | 0.975                               | 92.99                   | 7.11  | -    | 6.25                   | 3.63  | 2.29  |
| PET6-K7 *               | 1263                        | 0.519                         | 0.501                         | 0.965                               | 93.27                   | 6.73  | -    | 5.30                   | 3.87  | 2.29  |
| PET6-KU7 *              | 1165                        | 0.469                         | 0.460                         | 0.981                               | 77.97                   | 18.80 | 3.23 | 6.23                   | 4.58  | 2.82  |

<sup>a</sup> calculated using the Brunauer-Emmett-Teller model.

<sup>b</sup> total pore volume at  $p/p_0 = 0.99$  from the Horvath-Kawazoe equation.

<sup>c</sup> micropore volume from the Dubinin-Radushkevich Equation.

<sup>d</sup> calculated from the corresponding peak areas of the X-ray photoelectron spectroscopy (XPS) spectra.

<sup>e</sup> obtained at 1 bar using a volumetric sorption analyzer.

\* experimental data obtained from a previous publication <sup>S1</sup>.

**Table S15.***Process operation conditions and performance evaluation.*

| <b>Operation parameters</b>                   | <b>Value</b>                 |                |                 |  | <b>Unit</b> |
|-----------------------------------------------|------------------------------|----------------|-----------------|--|-------------|
| Heating medium temperature, $T_{\text{heat}}$ | 120                          |                |                 |  | °C          |
| Cooling medium temperature, $T_{\text{cool}}$ | 25                           |                |                 |  | °C          |
| Heat transfer temperature difference          | 5                            |                |                 |  | °C          |
| Adsorption pressure, $P_{\text{H}}$           | 1.0                          |                |                 |  | bar         |
| Vacuuming pressure, $P_{\text{vac}}$          | 0.1                          |                |                 |  | bar         |
| <b>Performance indicators</b>                 | <b>PET6-CO<sub>2</sub>-9</b> | <b>PET6-K7</b> | <b>PET6-KU7</b> |  |             |
| Productivity                                  | 32.88                        | 27.03          | 44.23           |  | kg/t h      |
| Purity                                        | 70.52                        | 71.57          | 77.73           |  | %           |
| Recovery                                      | 89.88                        | 84.93          | 90.02           |  | %           |
| Specific energy consumption, $E$              | 1.04                         | 1.44           | 0.97            |  | GJ/t        |
| Exergy efficiency, $E_{\text{ex}}$            | 7.21                         | 5.06           | 8.94            |  | %           |

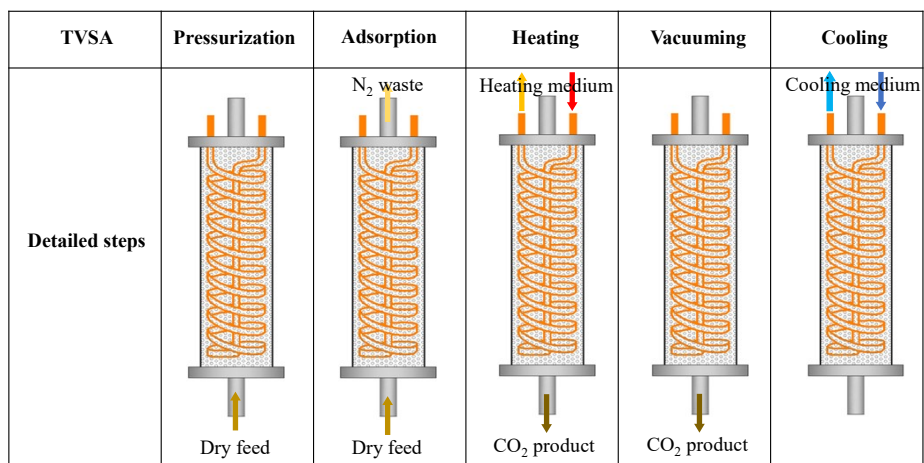

**Figure S1.** Schematic diagram of the 5-step temperature-vacuum swing adsorption (TVSA) process.



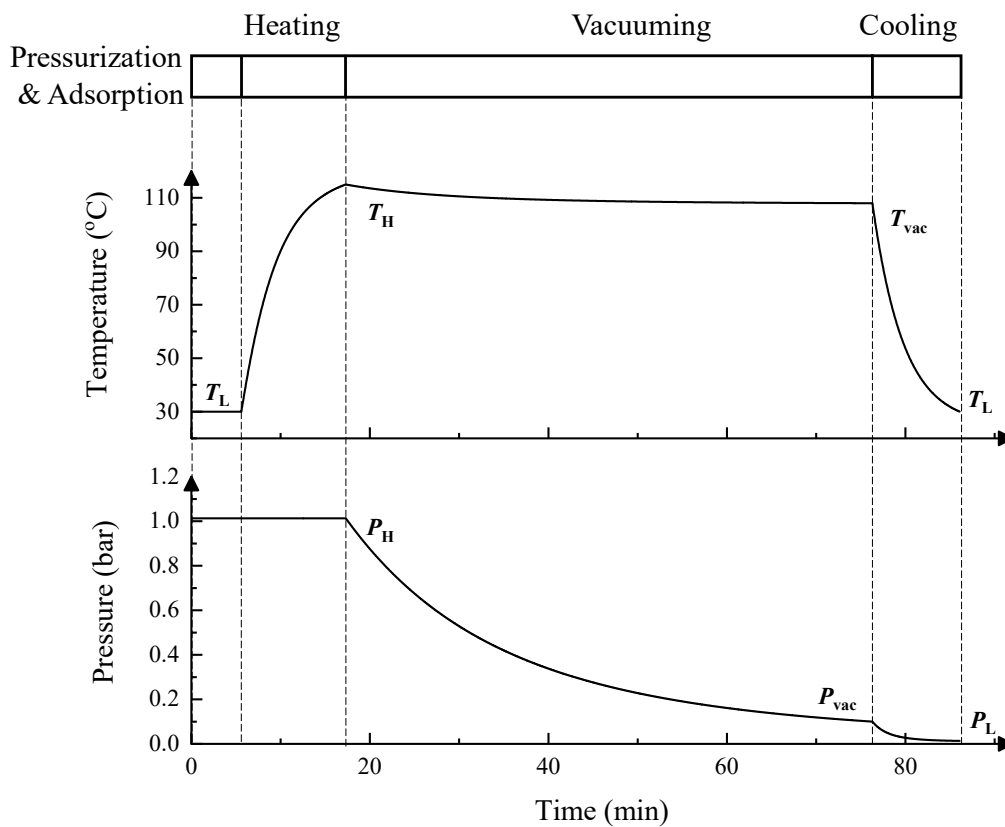

**Figure S2.** Temperature and pressure variations with time in the TVSA process.

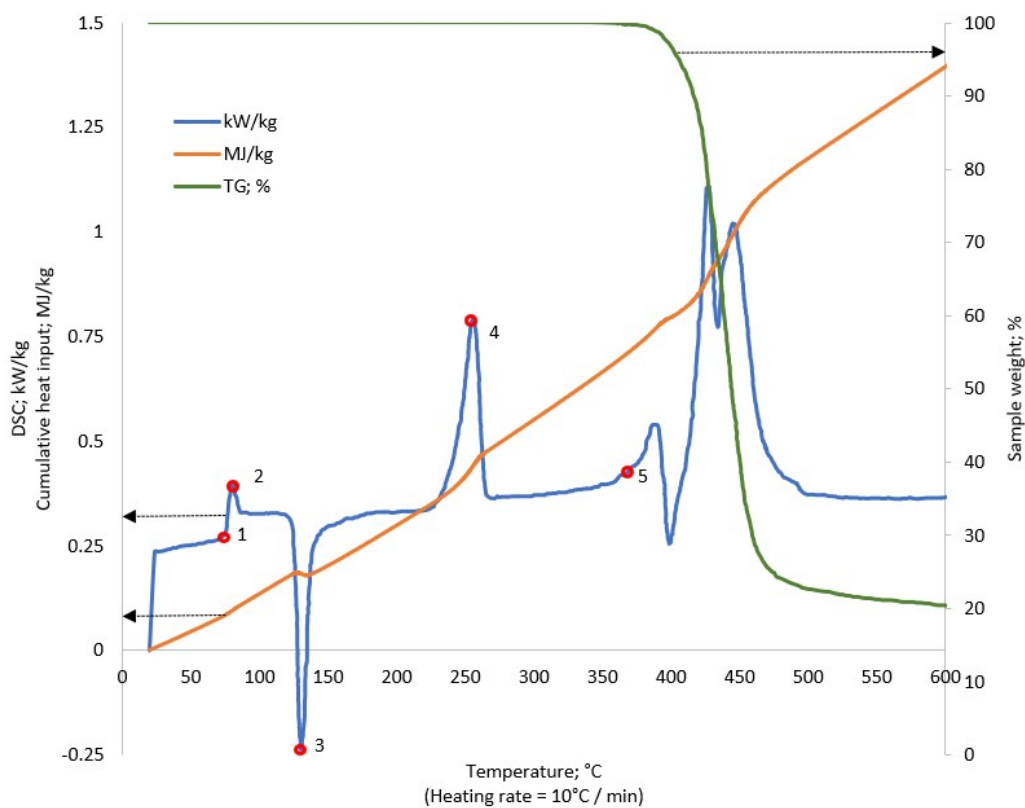

**Figure S3.** Differential scanning calorimetry (DSC) trace of a pure PET sample (blue line), reproduced from the instrument application sheet <sup>541</sup>. Temperature points 1–5 indicate glass transition (76 °C), relaxation (81 °C), cold crystallization (131 °C), melting (255 °C), and pyrolysis initiation (360 °C), respectively. The energy required for a sample to achieve a certain temperature at a constant heating rate of 10 °C/min is shown with cumulative heat input in MJ/kg (orange line). The loss of mass due to thermal decomposition is shown as a percentage by the green thermogravimetry (TG) line. To reach 600 °C, 1 kg of PET requires ~1.4 MJ of thermal energy with an additional ~1.17 MJ to maintain decomposition at 600 °C within 1 h.

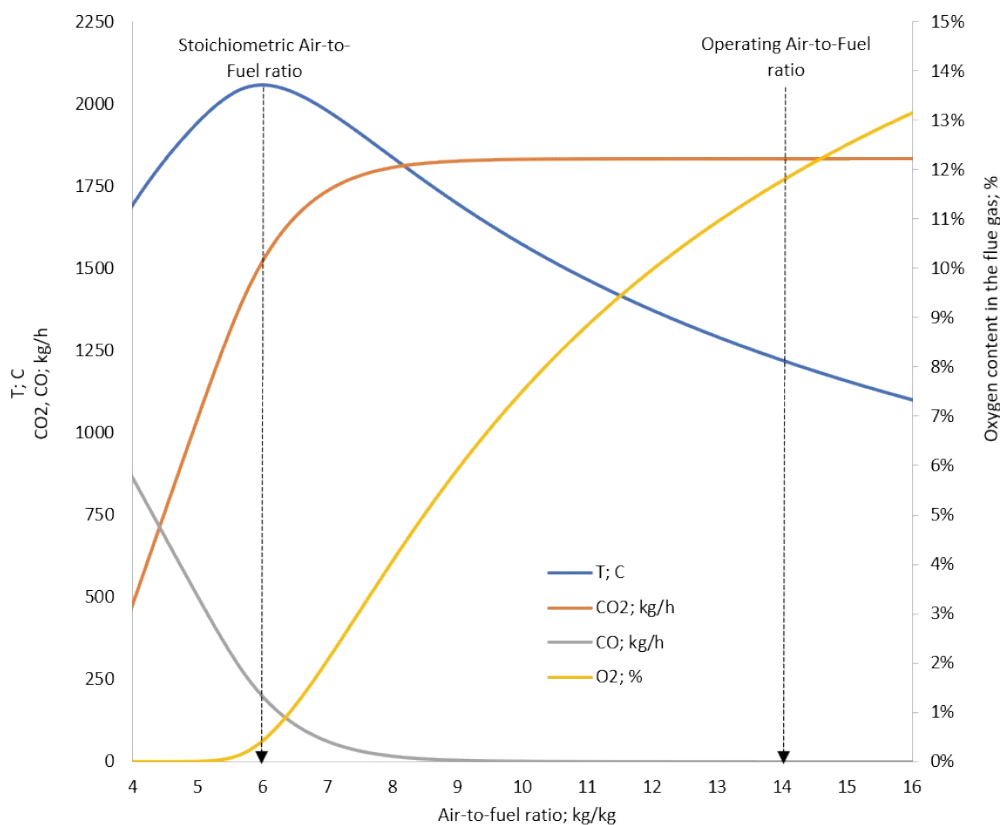

**Figure S4.** Results of a parametric sensitivity analysis simulation of pyrolysis vapors and a mixture of non-condensable gases with varying air-to-fuel (ATF) ratio. The operating ATF ratio was set to ~14 wt./wt. to insure complete combustion of all volatile organic compounds. The NO level at operating ATF ratio was 0.0876 wt.% of the flue gas. The lower heating value of 19.22 MJ/kg was determined to be the heat released from combusting the fuel mixture (pyrolysis vapors + non-condensable gases) with a stoichiometric quantity of air and by cooling the flue gases to 150 °C. Using the same principle, the lower heating values for pyrolysis vapors and non-condensable gasses were individually determined to be 25.07 MJ/kg and 9.05 MJ/kg, respectively.

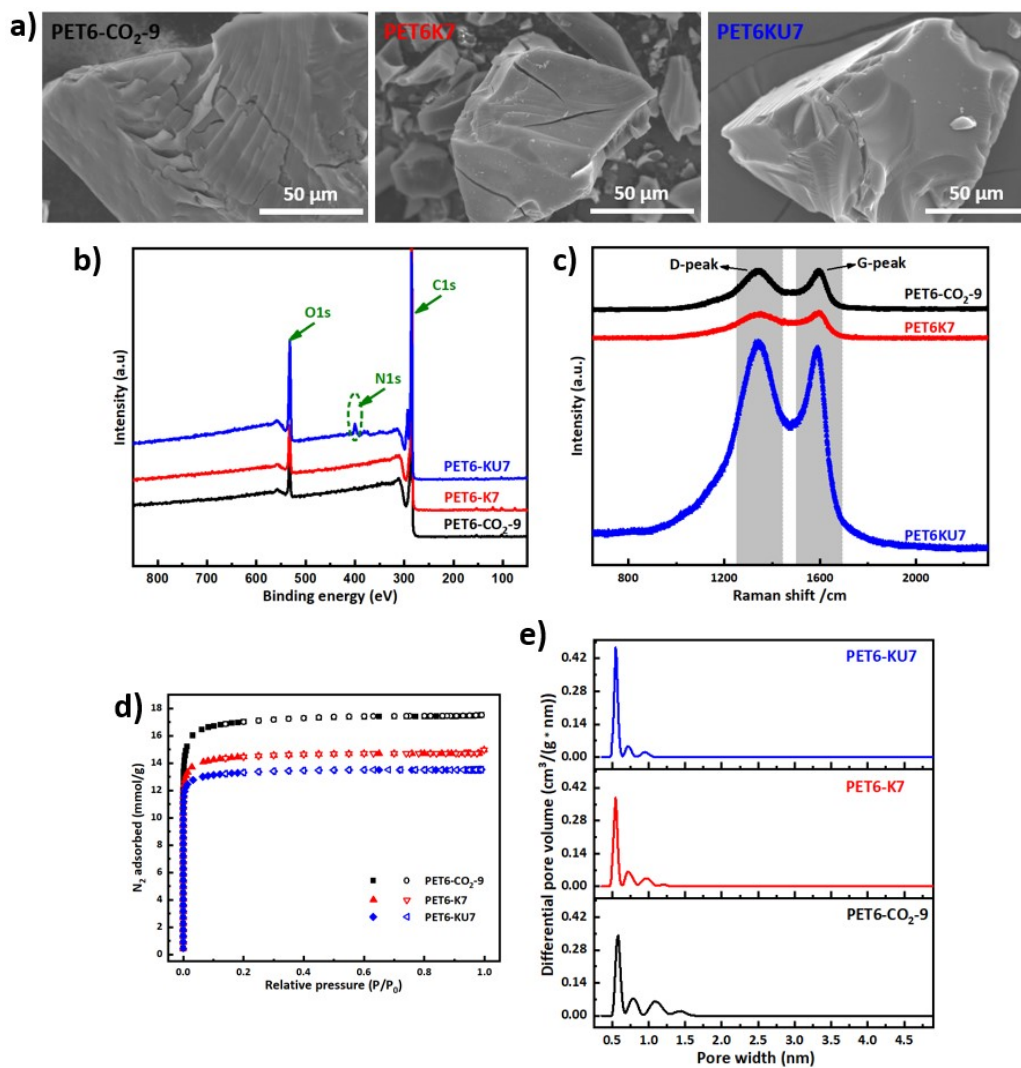

**Figure S5.** a) Scanning electron microscope images, b) X-ray photoelectron spectroscopy full survey. c) Raman spectra. d) N<sub>2</sub> adsorption isotherms (solid symbols) and desorption isotherms (open symbols) at -196 °C e) Pore size distributions (PSDs) in waste PET plastic-derived porous carbons (WPDPs). Note that all data for PET6-K7 and PET6-KU7 were derived from a previous publication<sup>S1</sup>.

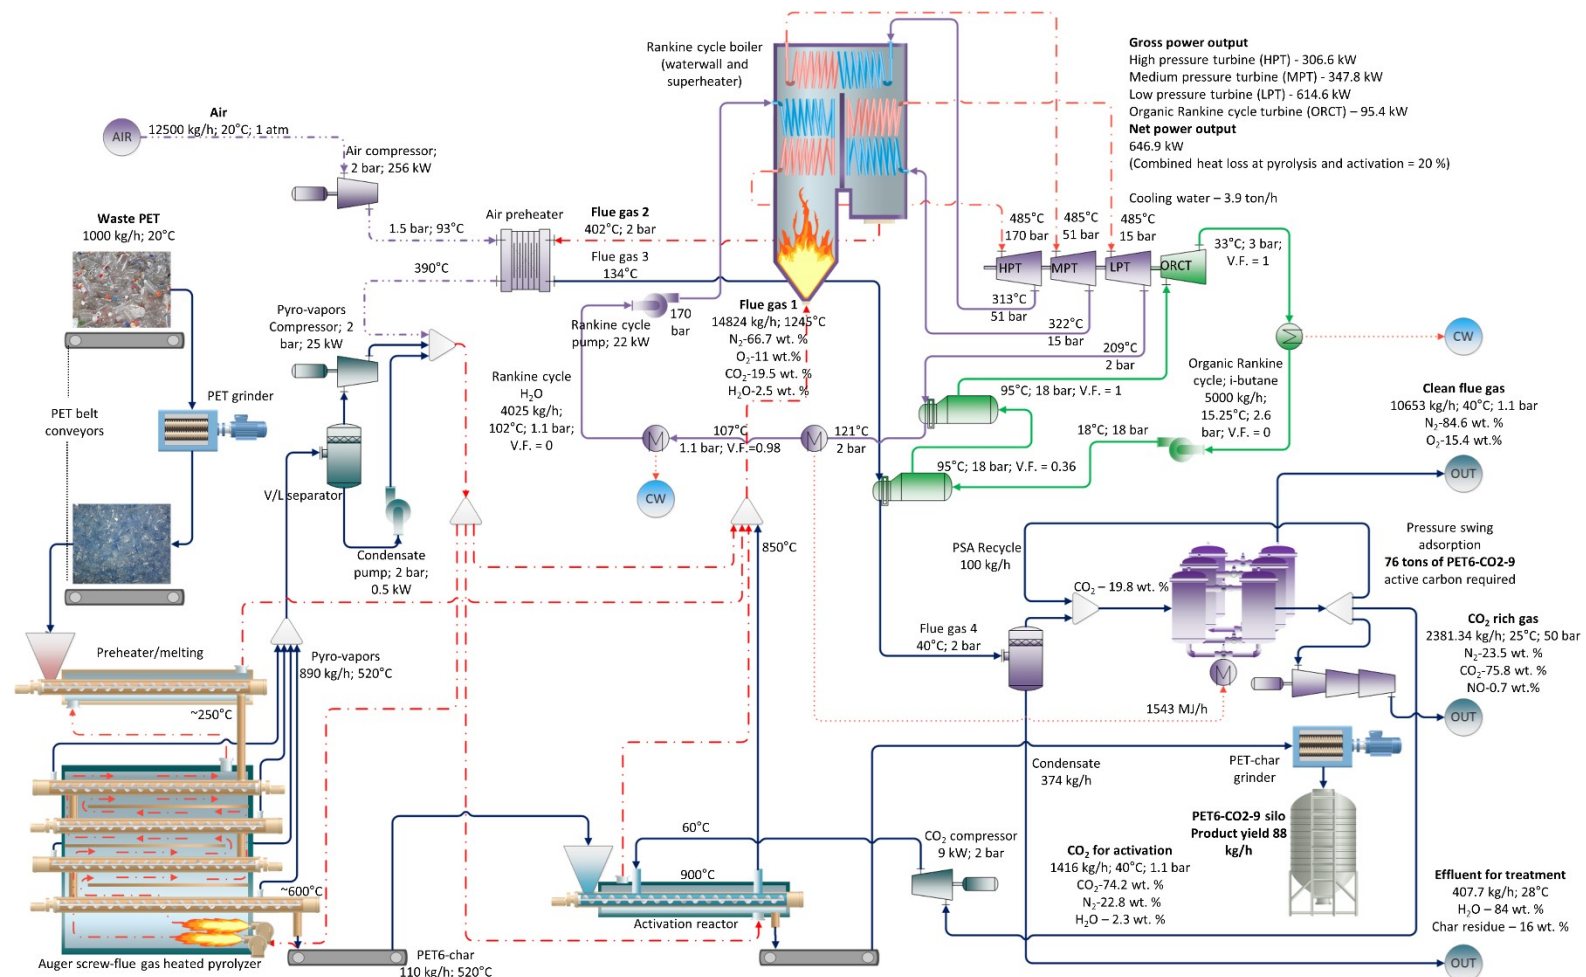

**Figure S6.** Process flow diagram of the PET6-CO<sub>2</sub>-9 porous carbon production process and flue gas CO<sub>2</sub> capture of a representative 1 t/h PET waste scale. Blue streamlines and unit operations indicate pyrolysis and activation processes. Purple streamlines and operations indicate the primary power (Rankine) cycle and CO<sub>2</sub> capture. Green streamlines indicate the secondary power (organic Rankine) cycle and a heat sink for the flue gas before the CO<sub>2</sub> capture process. Red streamlines indicate the primary heat sources for the process (lines and dots) and major heat duties of the unit operations (dots only).

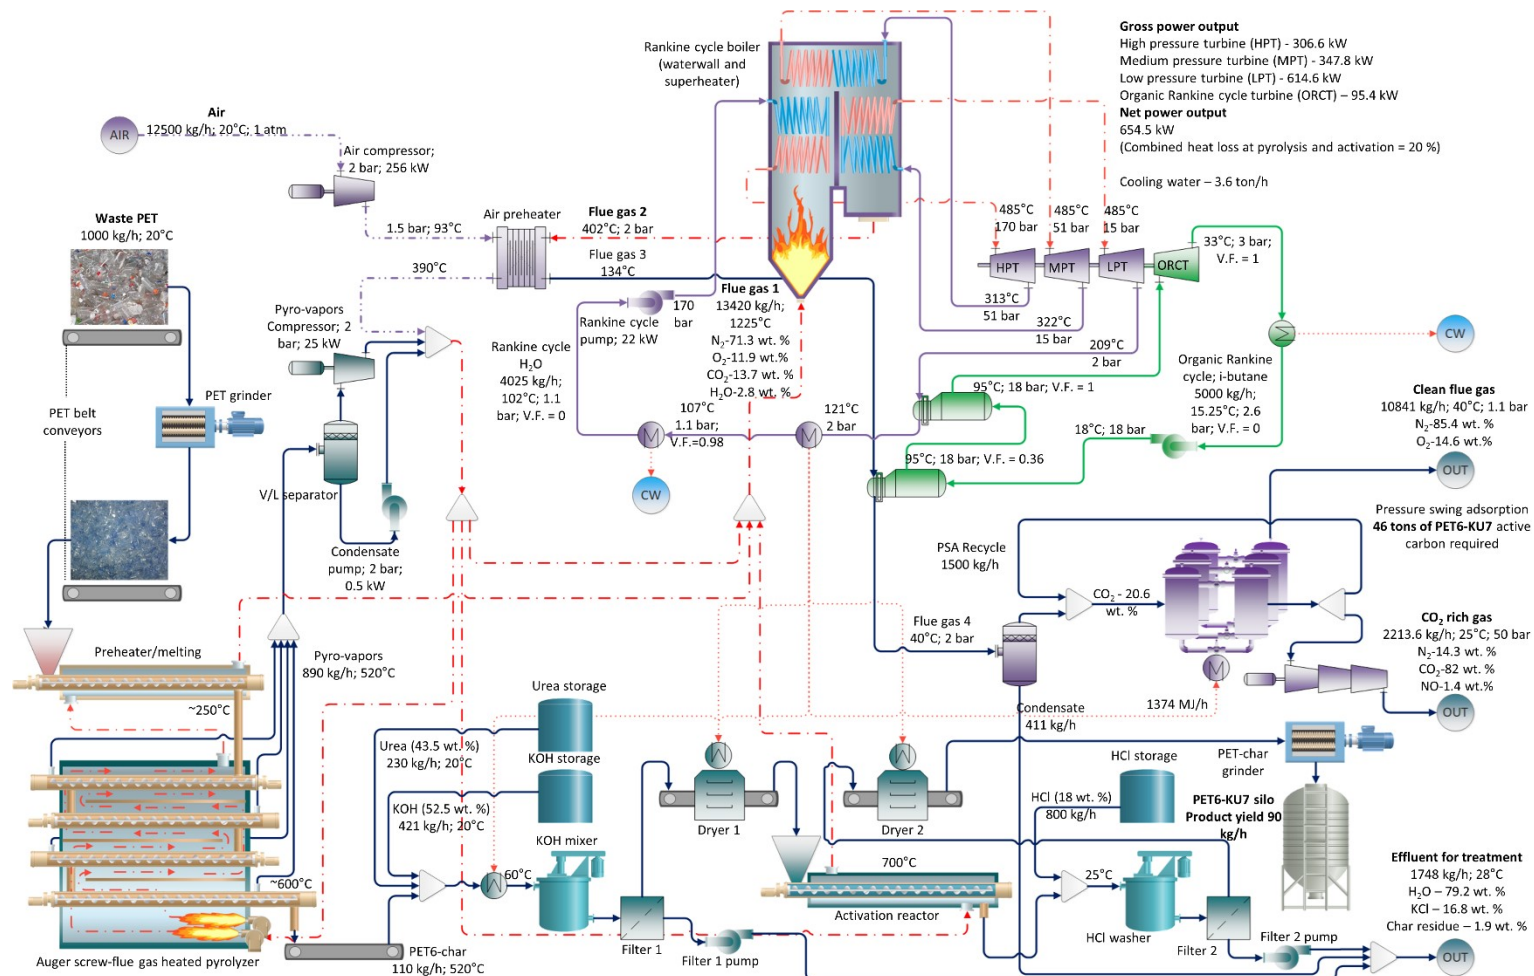

**Figure S7.** Process flow diagram of the PET6-KU7 porous carbon production process and flue gas CO<sub>2</sub> capture of a representative 1 t/h PET waste scale. Blue streamlines and unit operations indicate pyrolysis and activation processes. Purple streamlines and operations indicate the primary power (Rankine) cycle and CO<sub>2</sub> capture. Green streamlines indicate the secondary power (organic Rankine) cycle and a heat sink for the flue gas before the CO<sub>2</sub> capture process. Red streamlines indicate the primary heat sources for the process (lines and dots) and major heat duties of the unit operations (dots only).



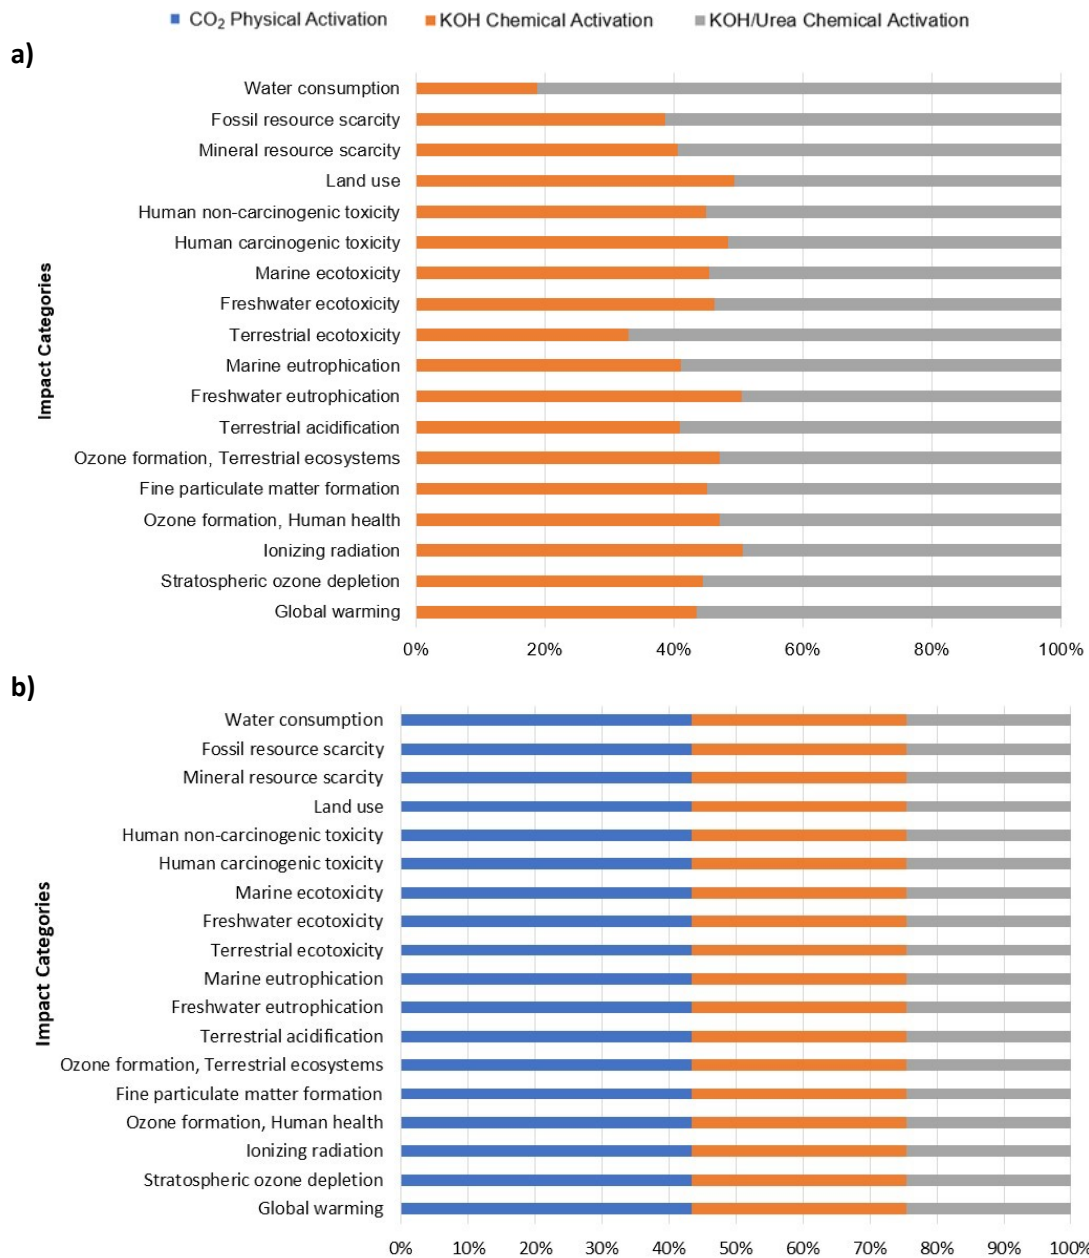

**Figure S8.** Midpoint assessment results of the physical and two chemical activation methods used to produce activated porous carbon material and capture “kg of CO<sub>2</sub> captured by WPDPCs” using the ReCiPe (H) impact assessment method: a) environmental impacts for the three methods; b) mitigated environmental for the three activation methods and is due to the reduction in energy from the national energy mix. The LCA results for the three activation methods shown here do not account for any additional approaches for the disposal of CO<sub>2</sub> emissions from the production unit; however, some emitted CO<sub>2</sub> was reused within the physical activation process and the leftover emissions were disposed of using a carbon capture facility. In this process, we observed that the adsorption properties of each porous carbon were different. For this reason, our functional unit (FU) is “kg of CO<sub>2</sub> captured by WPDPC.” In addition, to evaluate the mitigated environmental impacts related to energy consumption, we used the same FU. Note: The results are stacked for the three activation unit processes. Each colored bar represents the percentage contribution of an activation method unit process to a given impact category. The stacked contribution for the life cycle of CO<sub>2</sub> physical activation is zero because of the reuse of the produced CO<sub>2</sub> by the production unit.

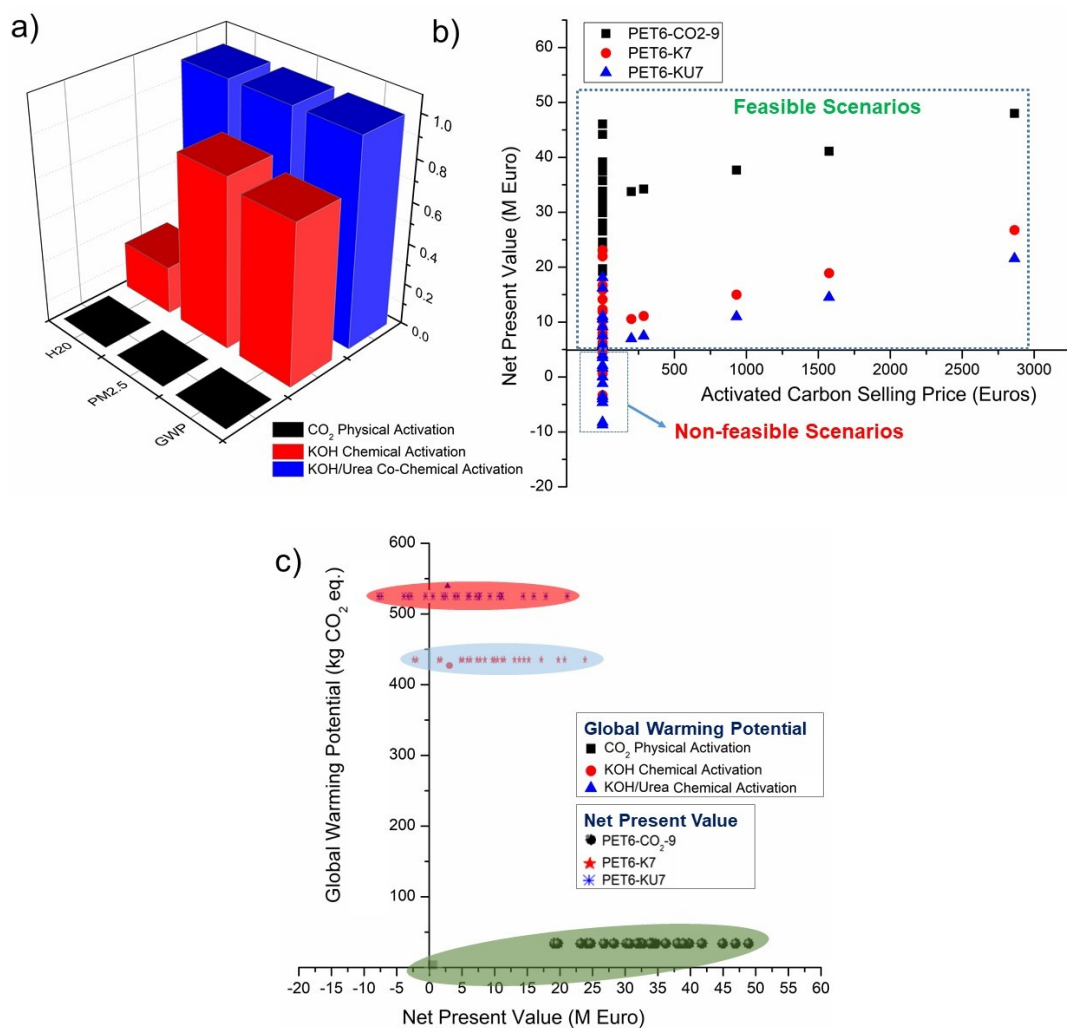

**Figure S9.** a) Normalized values of the selected impact categories (global warming potential [GWP], fine particulate matter formation [ $PM_{2.5}$ ], and water consumption [ $H_2O$ ]) of the three activation pathways. b) Clusters of net present values (NPVs) of the waste PET-derived activated material denoting variations in activated carbon selling prices and heat losses in the system that would affect power generation. The thick dotted blue box indicates all of the feasible scenarios, and the thin dotted line blue box represents the non-feasible scenarios. c) Clusters of feasible scenarios as revealed by the integrated life-cycle assessments and techno-economic assessments. The red ellipse represents higher environmental impacts and lower economic benefits, the light blue ellipse represents the moderate environmental impacts with considerable economic benefits, and the green ellipse represents lower environmental impacts with higher economic benefits.



## References

- S1. X. Yuan, S. Li, S. Jeon, et al., *J. Hazard. Mat.*, 2020, **399**, 123010.
- S2. D. Tiwari, C. Goel, H. Bhunia, P. K. Bajpai, *J. Environ. Manage.*, 2017, **197**, 415-427.
- S3. A. L. Chaffee, G. P. Knowles, Z. Liang, et al., *Int. J. Greenh. Gas Con.*, 2007, **1**, 11-18.
- S4. R. Zhao, L. Liu, L. Zhao, S. Deng, et al., *Renew. Sust. Energ. Rev.*, 2019, **114**, 109285.
- S5. R. Zhao, S. Deng, Y. Liu, et al., *Energy*, 2017, **119**, 1131-1143.
- S6. L. Jiang, R. Q. Wang, A. Gonzalez-Diaz, et al., *Appl. Therm. Eng.*, 2020, **169**, 114973.
- S7. R. Bai, M. Yang, G. Hu, L. Xu, Z. Li, S. Wang, W. Dai, M. Fan, *Carbon*, 2015, **81**, 465-473.
- S8. G. Singh, J. Lee, A. Karakoti, R. Bahadur, et al., *Chem. Soc. Rev.*, 2020, **49**, 4360-4404.
- S9. L. Rao, S. Liu, L. Wang, C. Ma, J. Wu, L. An, X. Hu, *Chem. Eng. J.*, 2019, **359**, 428-435.
- S10. H. Wei, J. Chen, N. Fu, H. Chen, H. Lin, S. Han, *Electrochim. Acta*, 2018, **266**, 161-169.
- S11. B. Kaur, R. K. Gupta, H. Bhunia, *Micropor. Mesopor. Mat.*, 2019, **282**, 146-158.
- S12. B. Kaur, J. Singh, R. K. Gupta, H. Bhunia, *J. Environ. Manage.*, 2019, **242**, 68-80.
- S13. X. Yuan, J. G. Lee, H. Yun, S. Deng, et al., *Chem. Eng. J.*, 2020, **397**, 125350.
- S14. A. Rehman, S.-J. Park, *Chem. Eng. J.*, 2019, **362**, 731-742.
- S15. S. Li, S. Deng, R. Zhao, L. Zhao, et al, *Energy*, 2019, **179**, 876-889.
- S16. A. Ajenifuja, L. Joss, M. Jobson, *Ind. Eng. Chem. Res.*, 2020, **59**, 3485-3497.
- S17. E. Ansah, L. Wang, A. Shahbazi, *Waste Manage.*, 2016, **56**, 196-206.
- S18. S. Du, J. A. Valla, R. S. Parnas, G. M. Bollas, *ACS Sustain. Chem. Eng.*, 2016, **4**, 2852-2860.
- S19. J. Lee, T. Lee, Y. F. Tsang, J.-I. Oh, E. E. Kwon, *Energ. Convers. Manage.*, 2017, **148**, 456-460.
- S20. J. Chattopadhyay, T. S. Pathak, R. Srivastava, A. C. Singh, *Energy*, 2016, **103**, 513-521.
- S21. M. Pohorely, M. Vosecky, P. Hejdova, et al., *Fuel*, 2006, **85**, 2458-2468.
- S22. D. Oh, H. W. Lee, Y.-M. Kim, Y.-K. Park, *Energy Procedia*, 2018, **144**, 111-117.
- S23. L. Chen, S. Wang, H. Meng, Z. Wu, J. Zhao, *Energy Procedia*, 2017, **105**, 391-397.
- S24. R. K. Singh, B. Ruj, A. K. Sadhukhan, P. Gupta, *J. Energy Inst.*, 2020, **93**, 1020-1035.
- S25. M. Azam, S. S. Jahromy, W. Raza, et al., *Environ. Int.*, 2020, **134**, 105291.
- S26. A. Dhahak, G. Hild, M. Rouaud, G. Mauviel, V. Burkle-Vitzthum, *J. Anal. Appl. Pyrol.*, 2019, **142**, 104664.
- S27. M. Dzięcioł, J. Trzecznyński, *J. Appl. Polym. Sci.*, 2001, **81**, 3064-3068.
- S28. A. Dhahak, V. Carre, F. Aubriet, G. Mauviel, V. Burkle-Vitzthum, *Ind. Eng. Chem. Res.*, 2020, **59**, 1495-1504.
- S29. Y. Yang, J. Wang, K. Chong, A. V. Bridgwater, *Energ. Convers. Manage.*, 2018, **174**, 406-416.
- S30. P. C. Badger, ORNL/TM-2002/199, 2002, DOE/EERE 10.2172/814666.

- S31. M. M. Wright, D. E. Dugaard, J. A. Satrio, P. C. Brown, *Fuel*, 2010, **89**, S2-S10.
- S32. Y. Yang, J. G. Brammer, D. G. Wrigh, et al., *Appl. Energ.*, 2017, **191**, 639-652.
- S33. R. Rowshanzadeh, Master thesis from KTH Sweden, 2010, 1-101.
- S34. B. F. Tchanche, S. Quoilin, S. Declaye, G. Papadakis, V. Lemort, *In Eng. System. Des. Anal.*, 2010, **49156**, 249-256.
- S35. T. Haeldermans, L. Champion, T. Kuppens, et al., *Bioresource Technol.*, 2020, **318**, 124083.
- S36. Price Monitoring Center, NDRC. China CN: Usage Price: Industrial Use Water: Tianjin from Jan. 2003 to Nov. 2019. <https://www.ceicdata.com/en/china/price-monitoring-center-ndrc-transaction-price-production-material-water-industrial-use/cn-usage-price-industrial-use-water-tianjin>.
- S37. D. C. Ko, E. L. Mui, K. S. Lau, G. McKay, *Waste Manage.*, 2004, **24**, 875-888.
- S38. T. Thewys, T. Kuppens, *Int. J. Phytoremediat.*, 2008, **10**, 561-583.
- S39. M. S. Peters, K. D. Timmerhaus, R. E. West, McGraw-Hill New York, 1968, Vol. 4.
- S40. X.-g. Zhao, G.-w. Jiang, A. Li, L. Wang, *Waste Manage.*, 2016, **48**, 604-618.
- S41. NETZSCH-Gerätebau GmbH, 2008, [www.netzsch.com](http://www.netzsch.com).
